# Supplementary material
Source: publisher figshare collection journal article supplement (https://acs.figshare.com/ndownloader/files/4757155)
Supplement: Supplementary file 1 [file 4757155]

data_publication_text
_publ_contact_author_name        'Yuguang Ma'
_publ_contact_author_address     
;Key Laboratory for Supramolecular Structure 
and Materials of Ministry of Education, 
Jilin University, 
Changchun, 130012, 
P. R. China.
;
_publ_contact_author_email       ygma@jlu.edu.cn
_publ_contact_author_phone       864315168480
_publ_contact_author_fax         864315168480
loop_
_publ_author_name
_publ_author_address
'Ma, Yuguang '
;Key Laboratory for Supramolecular Structure 
and Materials of Ministry of Education, 
Jilin University, 
Changchun, 130012, 
P. R. China.
;
'Xie, Zengqi'
;Key Laboratory for Supramolecular Structure 
and Materials of Ministry of Education, 
Jilin University, 
Changchun, 130012, 
P. R. China.
;
'Liu, Linlin'
;Key Laboratory for Supramolecular Structure 
and Materials of Ministry of Education, 
Jilin University, 
Changchun, 130012, 
P. R. China.
;
'Xie, Weijie'
;Key Laboratory for Supramolecular Structure 
and Materials of Ministry of Education, 
Jilin University, 
Changchun, 130012, 
P. R. China.
;
'Shen, Fangzhong'
;Key Laboratory for Supramolecular Structure 
and Materials of Ministry of Education, 
Jilin University, 
Changchun, 130012, 
P. R. China.
;
'Wang, Huan'
;Key Laboratory for Supramolecular Structure 
and Materials of Ministry of Education, 
Jilin University, 
Changchun, 130012, 
P. R. China.
;
'Yang, Xuyan'
;Key Laboratory for Supramolecular Structure 
and Materials of Ministry of Education, 
Jilin University, 
Changchun, 130012, 
P. R. China.
;
'Wang, Zhiming'
;Key Laboratory for Supramolecular Structure 
and Materials of Ministry of Education, 
Jilin University, 
Changchun, 130012, 
P. R. China.
;
'Li, Yupeng'
;Key Laboratory for Supramolecular Structure 
and Materials of Ministry of Education, 
Jilin University, 
Changchun, 130012, 
P. R. China.
;
'Hanif, Muddasir'
;Key Laboratory for Supramolecular Structure 
and Materials of Ministry of Education, 
Jilin University, 
Changchun, 130012, 
P. R. China.
;
'Yang, Bing'
;Key Laboratory for Supramolecular Structure 
and Materials of Ministry of Education, 
Jilin University, 
Changchun, 130012, 
P. R. China.
;
'Yang, Guangdi'
;Key Laboratory for Supramolecular Structure 
and Materials of Ministry of Education, 
Jilin University, 
Changchun, 130012, 
P. R. China.
;
'Ye, ling'
;Key Laboratory for Supramolecular Structure 
and Materials of Ministry of Education, 
Jilin University, 
Changchun, 130012, 
P. R. China.
;

  
data_cis-4f 
 
_audit_creation_method            SHELXL-97 
_chemical_name_systematic 
; 
 ? 
; 
_chemical_name_common             ? 
_chemical_melting_point           ? 
_chemical_formula_moiety          ? 
_chemical_formula_sum 
 'C34 H22 F4' 
_chemical_formula_weight          506.52 
 
loop_ 
 _atom_type_symbol 
 _atom_type_description 
 _atom_type_scat_dispersion_real 
 _atom_type_scat_dispersion_imag 
 _atom_type_scat_source 
 'C'  'C'   0.0033   0.0016 
 'International Tables Vol C Tables 4.2.6.8 and 6.1.1.4' 
 'H'  'H'   0.0000   0.0000 
 'International Tables Vol C Tables 4.2.6.8 and 6.1.1.4' 
 'F'  'F'   0.0171   0.0103 
 'International Tables Vol C Tables 4.2.6.8 and 6.1.1.4' 
 
_symmetry_cell_setting            Triclinic  
_symmetry_space_group_name_H-M     P-1 
 
loop_ 
 _symmetry_equiv_pos_as_xyz 
 'x, y, z' 
 '-x, -y, -z' 
 
_cell_length_a                    8.0544(16) 
_cell_length_b                    8.7247(17) 
_cell_length_c                    10.764(2) 
_cell_angle_alpha                 67.07(3) 
_cell_angle_beta                  88.05(3) 
_cell_angle_gamma                 66.99(3) 
_cell_volume                      634.9(2) 
_cell_formula_units_Z             1 
_cell_measurement_temperature     293(2) 
_cell_measurement_reflns_used     ? 
_cell_measurement_theta_min       ? 
_cell_measurement_theta_max       ? 
 
_exptl_crystal_description       block  
_exptl_crystal_colour            colorless  
_exptl_crystal_size_max           0.288 
_exptl_crystal_size_mid           0.186 
_exptl_crystal_size_min           0.159 
_exptl_crystal_density_meas       ? 
_exptl_crystal_density_diffrn     1.325 
_exptl_crystal_density_method     'not measured' 
_exptl_crystal_F_000              262 
_exptl_absorpt_coefficient_mu     0.096 
_exptl_absorpt_correction_type    ? 
_exptl_absorpt_correction_T_min   ? 
_exptl_absorpt_correction_T_max   ? 
_exptl_absorpt_process_details    ? 
 
_exptl_special_details 
; 
 ? 
; 
 
_diffrn_ambient_temperature       293(2) 
_diffrn_radiation_wavelength      0.71073 
_diffrn_radiation_type            MoK\a 
_diffrn_radiation_source          'fine-focus sealed tube' 
_diffrn_radiation_monochromator   graphite 
_diffrn_measurement_device_type   ? 
_diffrn_measurement_method        ? 
_diffrn_detector_area_resol_mean  ? 
_diffrn_standards_number          ? 
_diffrn_standards_interval_count  ? 
_diffrn_standards_interval_time   ? 
_diffrn_standards_decay_%         ? 
_diffrn_reflns_number             6314 
_diffrn_reflns_av_R_equivalents   0.0323 
_diffrn_reflns_av_sigmaI/netI     0.0455 
_diffrn_reflns_limit_h_min        -10 
_diffrn_reflns_limit_h_max        9 
_diffrn_reflns_limit_k_min        -11 
_diffrn_reflns_limit_k_max        11 
_diffrn_reflns_limit_l_min        -13 
_diffrn_reflns_limit_l_max        13 
_diffrn_reflns_theta_min          3.02 
_diffrn_reflns_theta_max          27.47 
_reflns_number_total              2880 
_reflns_number_gt                 1613 
_reflns_threshold_expression      >2sigma(I) 
 
_computing_data_collection        ? 
_computing_cell_refinement        ? 
_computing_data_reduction         ? 
_computing_structure_solution     'SHELXS-97 (Sheldrick, 1990)' 
_computing_structure_refinement   'SHELXL-97 (Sheldrick, 1997)' 
_computing_molecular_graphics     ? 
_computing_publication_material   ? 
 
_refine_special_details 
; 
 Refinement of F^2^ against ALL reflections.  The weighted R-factor wR and 
 goodness of fit S are based on F^2^, conventional R-factors R are based 
 on F, with F set to zero for negative F^2^. The threshold expression of 
 F^2^ > 2sigma(F^2^) is used only for calculating R-factors(gt) etc. and is 
 not relevant to the choice of reflections for refinement.  R-factors based 
 on F^2^ are statistically about twice as large as those based on F, and R- 
 factors based on ALL data will be even larger. 
; 
 
_refine_ls_structure_factor_coef  Fsqd  
_refine_ls_matrix_type            full 
_refine_ls_weighting_scheme       calc  
_refine_ls_weighting_details 
 'calc w=1/[\s^2^(Fo^2^)+(0.0496P)^2^+0.1551P] where P=(Fo^2^+2Fc^2^)/3' 
_atom_sites_solution_primary      direct 
_atom_sites_solution_secondary    difmap 
_atom_sites_solution_hydrogens    geom 
_refine_ls_hydrogen_treatment     mixed 
_refine_ls_extinction_method      none 
_refine_ls_extinction_coef        ? 
_refine_ls_number_reflns          2880 
_refine_ls_number_parameters      216 
_refine_ls_number_restraints      0 
_refine_ls_R_factor_all           0.1018 
_refine_ls_R_factor_gt            0.0496 
_refine_ls_wR_factor_ref          0.1314 
_refine_ls_wR_factor_gt           0.1043 
_refine_ls_goodness_of_fit_ref    1.027 
_refine_ls_restrained_S_all       1.027 
_refine_ls_shift/su_max           0.000 
_refine_ls_shift/su_mean          0.000 
 
loop_ 
 _atom_site_label 
 _atom_site_type_symbol 
 _atom_site_fract_x 
 _atom_site_fract_y 
 _atom_site_fract_z 
 _atom_site_U_iso_or_equiv 
 _atom_site_adp_type 
 _atom_site_occupancy 
 _atom_site_symmetry_multiplicity 
 _atom_site_calc_flag 
 _atom_site_refinement_flags 
 _atom_site_disorder_assembly 
 _atom_site_disorder_group 
F1 F 1.18133(18) -0.20625(19) 0.77877(13) 0.0723(5) Uani 1 1 d . . . 
C13 C 0.9426(3) 0.0789(3) 0.6593(2) 0.0447(5) Uani 1 1 d . . . 
C1 C 0.5906(3) 0.4603(3) 0.3990(2) 0.0402(5) Uani 1 1 d . . . 
C12 C 0.8801(2) 0.2533(3) 0.5543(2) 0.0408(5) Uani 1 1 d . . . 
C3 C 0.6842(2) 0.3812(3) 0.5292(2) 0.0398(5) Uani 1 1 d . . . 
C2 C 0.4066(2) 0.5795(3) 0.36665(19) 0.0394(5) Uani 1 1 d . . . 
F2 F 1.29556(19) 0.2335(2) 0.41130(19) 0.0938(6) Uani 1 1 d . . . 
C14 C 1.1226(3) -0.0363(3) 0.6765(2) 0.0493(6) Uani 1 1 d . . . 
C5 C 0.3704(3) 0.7024(3) 0.1090(2) 0.0489(6) Uani 1 1 d . . . 
C17 C 1.0006(3) 0.3048(3) 0.4699(2) 0.0503(6) Uani 1 1 d . . . 
C4 C 0.3105(3) 0.6492(3) 0.2286(2) 0.0466(5) Uani 1 1 d . . . 
C15 C 1.2454(3) 0.0101(4) 0.5972(3) 0.0566(6) Uani 1 1 d . . . 
C6 C 0.5400(3) 0.7266(3) 0.0784(2) 0.0451(5) Uani 1 1 d . . . 
C16 C 1.1792(3) 0.1822(4) 0.4944(3) 0.0572(6) Uani 1 1 d . . . 
C7 C 0.6195(3) 0.7909(3) 0.1485(2) 0.0519(6) Uani 1 1 d . . . 
C11 C 0.6224(3) 0.6896(4) -0.0284(2) 0.0566(6) Uani 1 1 d . . . 
C8 C 0.7785(4) 0.8119(4) 0.1150(3) 0.0649(7) Uani 1 1 d . . . 
C10 C 0.7824(4) 0.7111(4) -0.0607(3) 0.0720(8) Uani 1 1 d . . . 
C9 C 0.8599(4) 0.7700(4) 0.0121(3) 0.0744(9) Uani 1 1 d . . . 
H4 H 0.189(3) 0.645(3) 0.227(2) 0.043(5) Uiso 1 1 d . . . 
H1 H 0.655(3) 0.427(3) 0.330(2) 0.055(6) Uiso 1 1 d . . . 
H17 H 0.958(3) 0.427(4) 0.393(3) 0.070(7) Uiso 1 1 d . . . 
H15 H 1.370(4) -0.071(4) 0.610(3) 0.076(8) Uiso 1 1 d . . . 
H13 H 0.864(3) 0.045(3) 0.715(2) 0.054(7) Uiso 1 1 d . . . 
H7 H 0.565(3) 0.819(3) 0.222(2) 0.064(7) Uiso 1 1 d . . . 
H5 H 0.294(3) 0.733(3) 0.027(2) 0.059(7) Uiso 1 1 d . . . 
H11 H 0.565(3) 0.649(3) -0.081(2) 0.064(7) Uiso 1 1 d . . . 
H10 H 0.831(4) 0.684(4) -0.136(3) 0.092(9) Uiso 1 1 d . . . 
H8 H 0.834(4) 0.857(4) 0.166(3) 0.084(9) Uiso 1 1 d . . . 
H9 H 0.972(4) 0.785(4) -0.014(3) 0.094(10) Uiso 1 1 d . . . 
 
loop_ 
 _atom_site_aniso_label 
 _atom_site_aniso_U_11 
 _atom_site_aniso_U_22 
 _atom_site_aniso_U_33 
 _atom_site_aniso_U_23 
 _atom_site_aniso_U_13 
 _atom_site_aniso_U_12 
F1 0.0656(8) 0.0535(9) 0.0556(8) -0.0125(7) -0.0016(7) 0.0080(7) 
C13 0.0360(10) 0.0476(14) 0.0443(11) -0.0209(10) 0.0041(9) -0.0088(10) 
C1 0.0366(10) 0.0377(12) 0.0397(10) -0.0151(9) 0.0077(9) -0.0098(9) 
C12 0.0323(9) 0.0431(12) 0.0442(11) -0.0212(9) 0.0031(8) -0.0093(9) 
C3 0.0311(9) 0.0368(12) 0.0459(11) -0.0169(9) 0.0043(8) -0.0084(8) 
C2 0.0359(10) 0.0375(12) 0.0389(10) -0.0131(9) 0.0049(8) -0.0118(9) 
F2 0.0518(8) 0.0908(13) 0.1274(14) -0.0353(11) 0.0430(9) -0.0300(8) 
C14 0.0450(11) 0.0424(13) 0.0455(11) -0.0192(10) -0.0054(10) -0.0009(10) 
C5 0.0424(11) 0.0538(14) 0.0436(11) -0.0216(10) -0.0011(10) -0.0109(10) 
C17 0.0388(11) 0.0473(14) 0.0604(14) -0.0219(12) 0.0108(10) -0.0138(10) 
C4 0.0336(10) 0.0512(14) 0.0488(12) -0.0219(10) -0.0012(9) -0.0093(9) 
C15 0.0312(10) 0.0625(16) 0.0702(15) -0.0363(13) 0.0026(11) -0.0041(11) 
C6 0.0420(11) 0.0427(13) 0.0387(10) -0.0121(9) 0.0000(9) -0.0099(9) 
C16 0.0381(11) 0.0651(17) 0.0724(16) -0.0326(14) 0.0198(11) -0.0215(11) 
C7 0.0571(13) 0.0519(15) 0.0428(12) -0.0164(11) 0.0035(11) -0.0211(11) 
C11 0.0583(14) 0.0615(17) 0.0480(13) -0.0245(12) 0.0111(11) -0.0210(12) 
C8 0.0604(15) 0.0713(19) 0.0620(15) -0.0200(14) 0.0020(13) -0.0328(14) 
C10 0.0665(17) 0.082(2) 0.0584(15) -0.0267(15) 0.0225(14) -0.0243(15) 
C9 0.0520(15) 0.087(2) 0.0678(17) -0.0142(16) 0.0082(13) -0.0300(15) 
 
_geom_special_details 
; 
 All esds (except the esd in the dihedral angle between two l.s. planes) 
 are estimated using the full covariance matrix.  The cell esds are taken 
 into account individually in the estimation of esds in distances, angles 
 and torsion angles; correlations between esds in cell parameters are only 
 used when they are defined by crystal symmetry.  An approximate (isotropic) 
 treatment of cell esds is used for estimating esds involving l.s. planes. 
; 
 
loop_ 
 _geom_bond_atom_site_label_1 
 _geom_bond_atom_site_label_2 
 _geom_bond_distance 
 _geom_bond_site_symmetry_2 
 _geom_bond_publ_flag 
F1 C14 1.360(3) . ? 
C13 C14 1.371(3) . ? 
C13 C12 1.395(3) . ? 
C1 C3 1.386(3) . ? 
C1 C2 1.396(3) . ? 
C12 C17 1.389(3) . ? 
C12 C3 1.492(3) . ? 
C3 C2 1.398(3) 2_666 ? 
C2 C3 1.398(3) 2_666 ? 
C2 C4 1.478(3) . ? 
F2 C16 1.356(3) . ? 
C14 C15 1.363(3) . ? 
C5 C4 1.331(3) . ? 
C5 C6 1.469(3) . ? 
C17 C16 1.373(3) . ? 
C15 C16 1.372(4) . ? 
C6 C7 1.392(3) . ? 
C6 C11 1.392(3) . ? 
C7 C8 1.380(4) . ? 
C11 C10 1.387(4) . ? 
C8 C9 1.367(4) . ? 
C10 C9 1.366(4) . ? 
 
loop_ 
 _geom_angle_atom_site_label_1 
 _geom_angle_atom_site_label_2 
 _geom_angle_atom_site_label_3 
 _geom_angle 
 _geom_angle_site_symmetry_1 
 _geom_angle_site_symmetry_3 
 _geom_angle_publ_flag 
C14 C13 C12 118.6(2) . . ? 
C3 C1 C2 122.32(19) . . ? 
C17 C12 C13 119.41(19) . . ? 
C17 C12 C3 120.1(2) . . ? 
C13 C12 C3 120.41(19) . . ? 
C1 C3 C2 119.74(17) . 2_666 ? 
C1 C3 C12 118.37(19) . . ? 
C2 C3 C12 121.88(17) 2_666 . ? 
C1 C2 C3 117.94(17) . 2_666 ? 
C1 C2 C4 119.92(19) . . ? 
C3 C2 C4 121.98(17) 2_666 . ? 
F1 C14 C15 118.36(19) . . ? 
F1 C14 C13 117.9(2) . . ? 
C15 C14 C13 123.7(2) . . ? 
C4 C5 C6 129.2(2) . . ? 
C16 C17 C12 118.5(2) . . ? 
C5 C4 C2 128.8(2) . . ? 
C14 C15 C16 116.2(2) . . ? 
C7 C6 C11 118.1(2) . . ? 
C7 C6 C5 123.1(2) . . ? 
C11 C6 C5 118.8(2) . . ? 
F2 C16 C15 118.4(2) . . ? 
F2 C16 C17 118.1(2) . . ? 
C15 C16 C17 123.5(2) . . ? 
C8 C7 C6 120.6(2) . . ? 
C10 C11 C6 120.5(3) . . ? 
C9 C8 C7 120.3(3) . . ? 
C9 C10 C11 120.0(3) . . ? 
C10 C9 C8 120.3(3) . . ? 
 
_diffrn_measured_fraction_theta_max    0.990 
_diffrn_reflns_theta_full              27.47 
_diffrn_measured_fraction_theta_full   0.990 
_refine_diff_density_max    0.213 
_refine_diff_density_min   -0.194 
_refine_diff_density_rms    0.040 
